# Supplementary material for: Multicomponent one-pot synthesis of highly-functionalized pyrrole-3-carbonitriles in aqueous medium and their computational study
Source: Royal Society of Chemistry journal article supplement (doi:10.1039/c4ob02229g), 2014-12-01
Supplement: c4ob02229g1.pdf [file c4ob02229g1.pdf]

## Multicomponent one-pot synthesis of highly functionalized Pyrrole-3-carbonitriles in aqueous medium and computational study

Ramakanth Pagadala, Devendar Reddy Kommidi, Shravankumar Kankala, Suresh Maddila, Parvesh Singh, Brenda Moodley, N. A. Koorbanally, Sreekantha B. Jonnalagadda\*

School of Chemistry and Physics, University of KwaZulu-Natal, Westville Campus, Chiltern Hills, Durban-4000, South Africa

Corresponding author: Tel.: +27 31 260 7325/3090; fax: +27 31 260 3091

E-mail: [jonnalagaddas@ukzn.ac.za](mailto:jonnalagaddas@ukzn.ac.za)

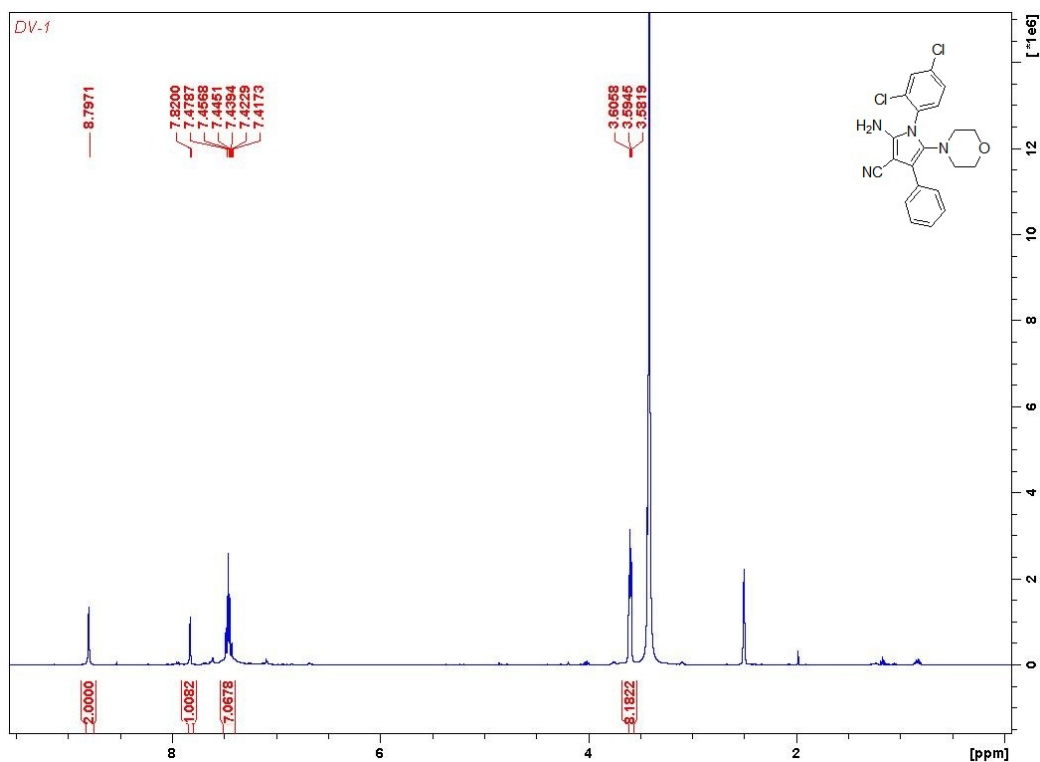

<sup>1</sup>H NMR spectra of compound 5a

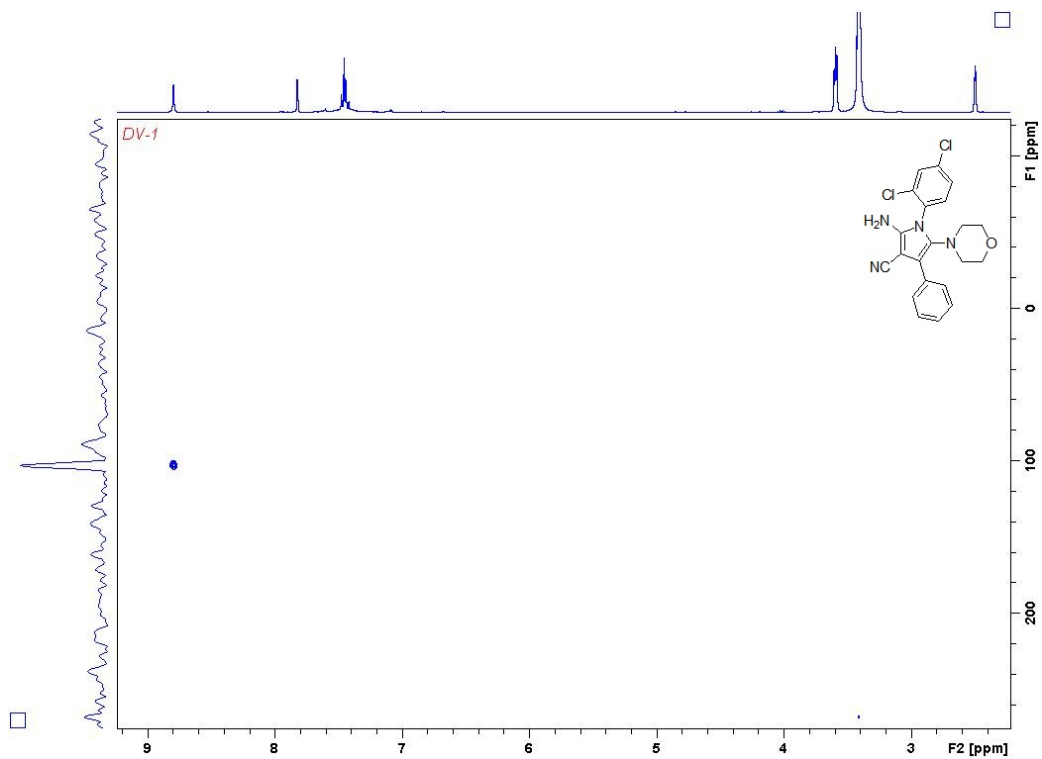

$^{15}\text{N}$  NMR (ghsqc) spectra of compound **5a**

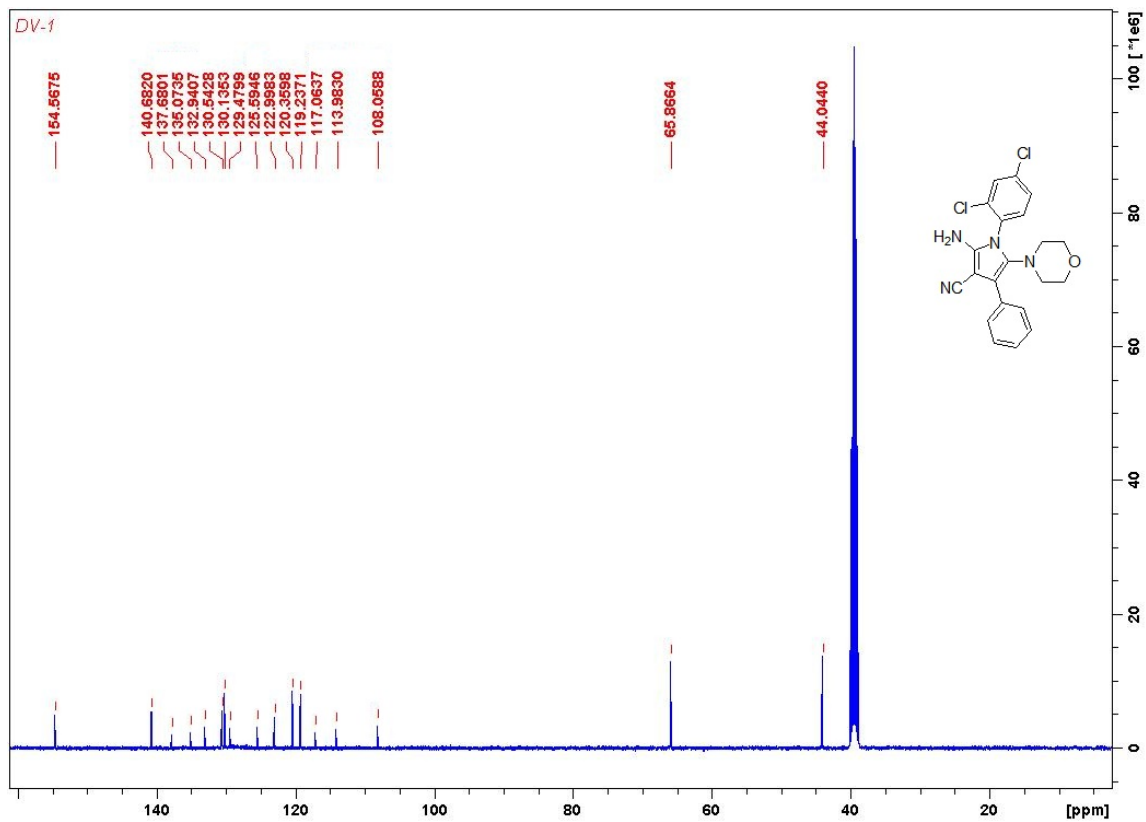

# <sup>13</sup>C NMR spectra of compound 5a

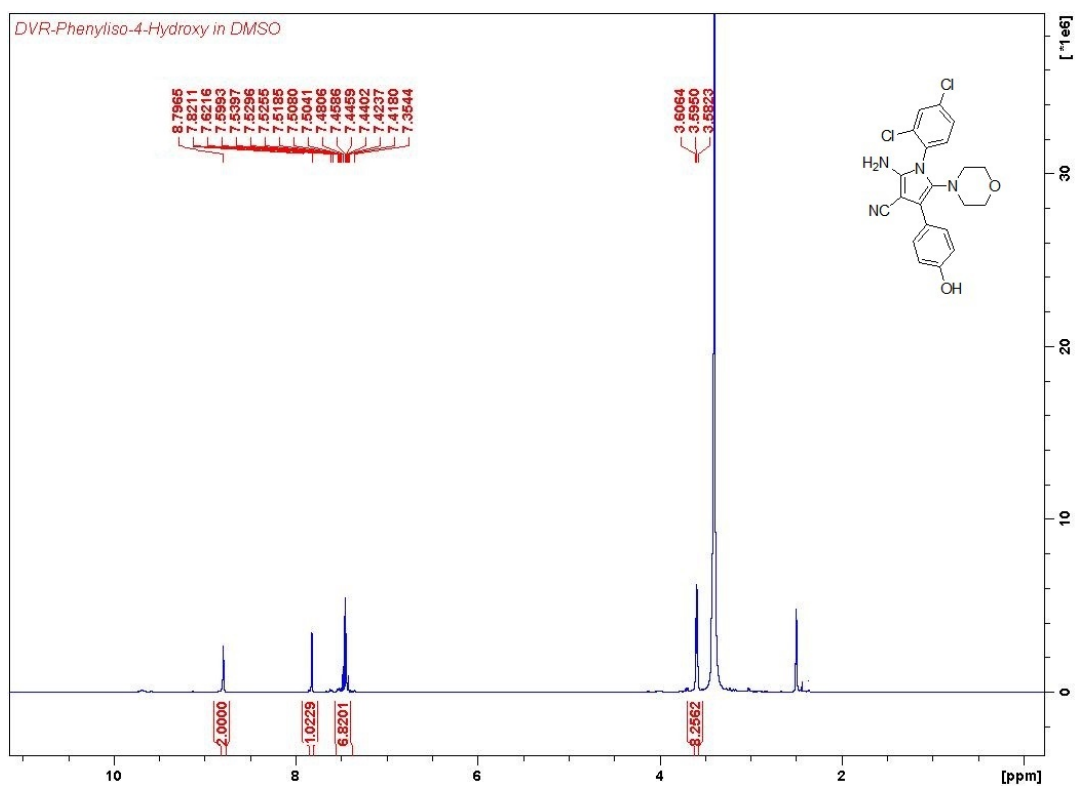

# <sup>1</sup>H NMR spectra of compound 5b

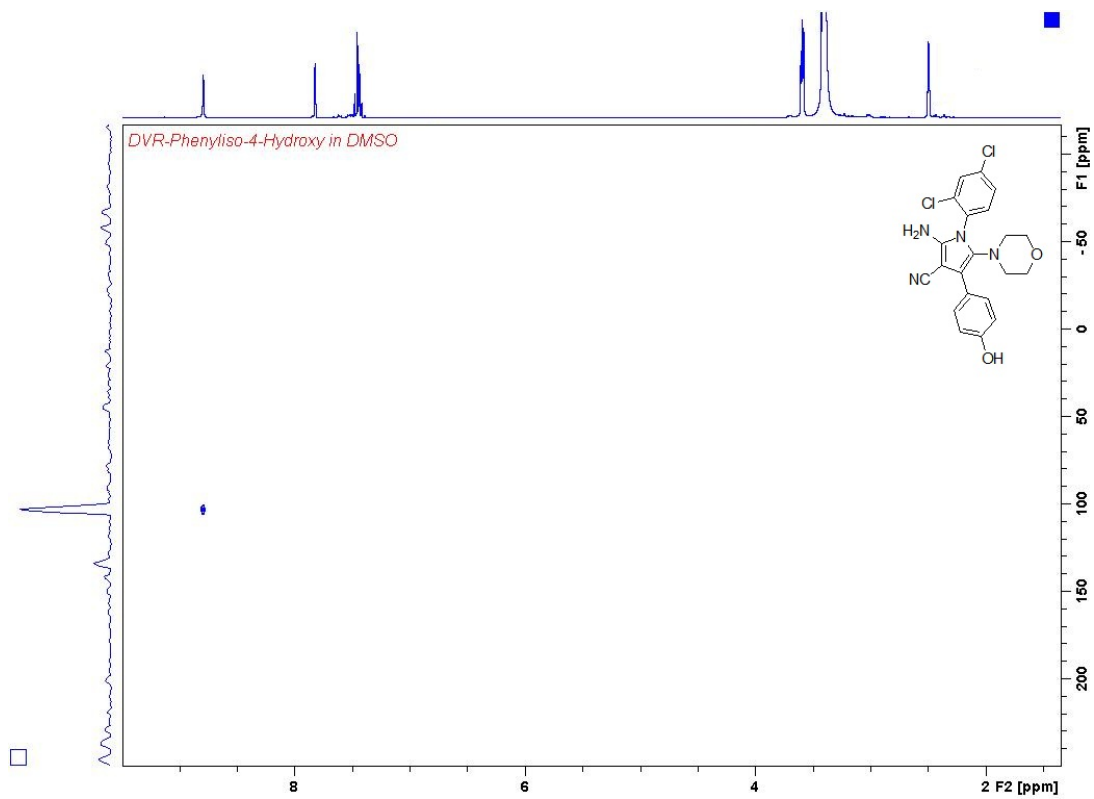

<sup>15</sup>N NMR (ghsqc) spectra of compound **5b**

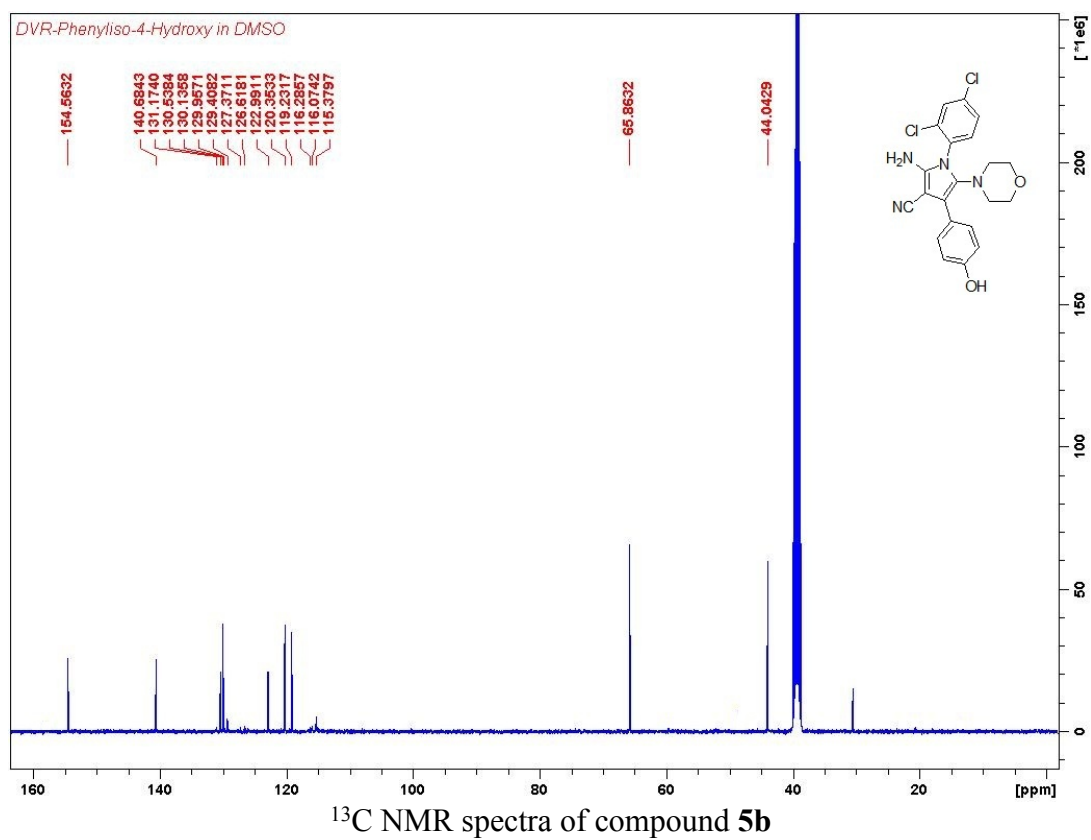

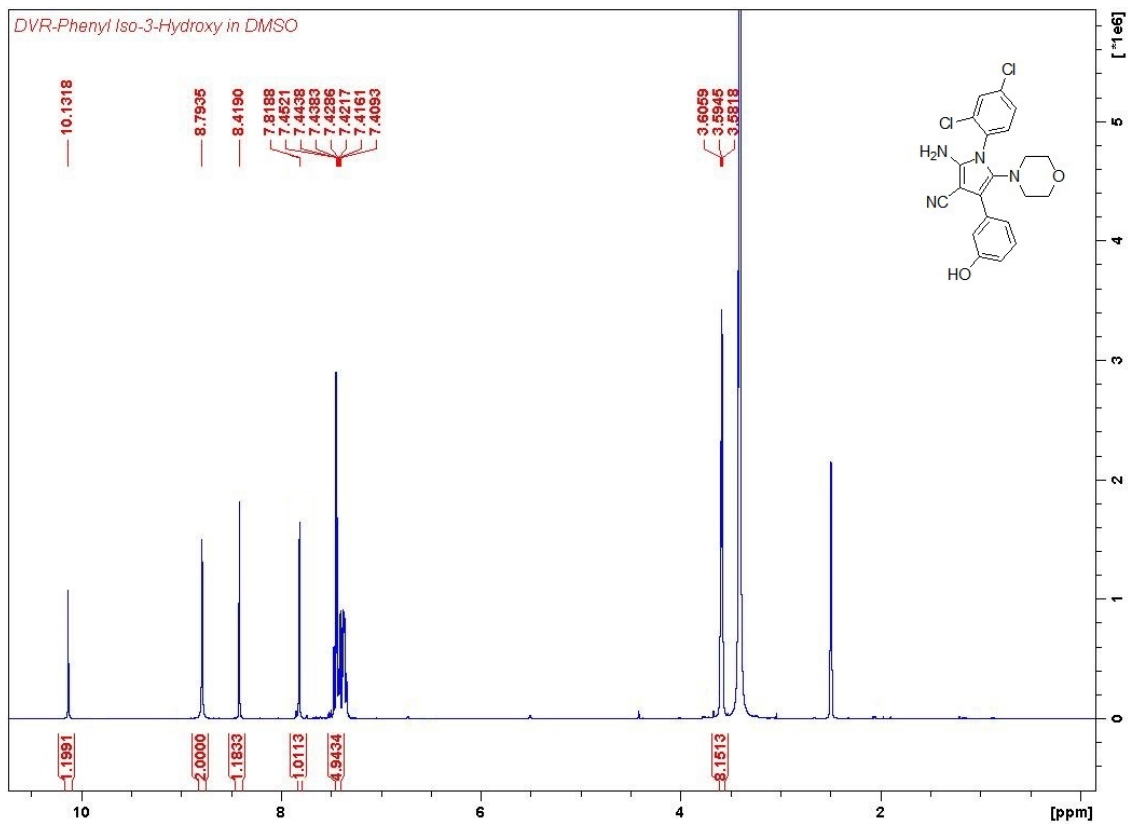

<sup>1</sup>H NMR spectra of compound 5c

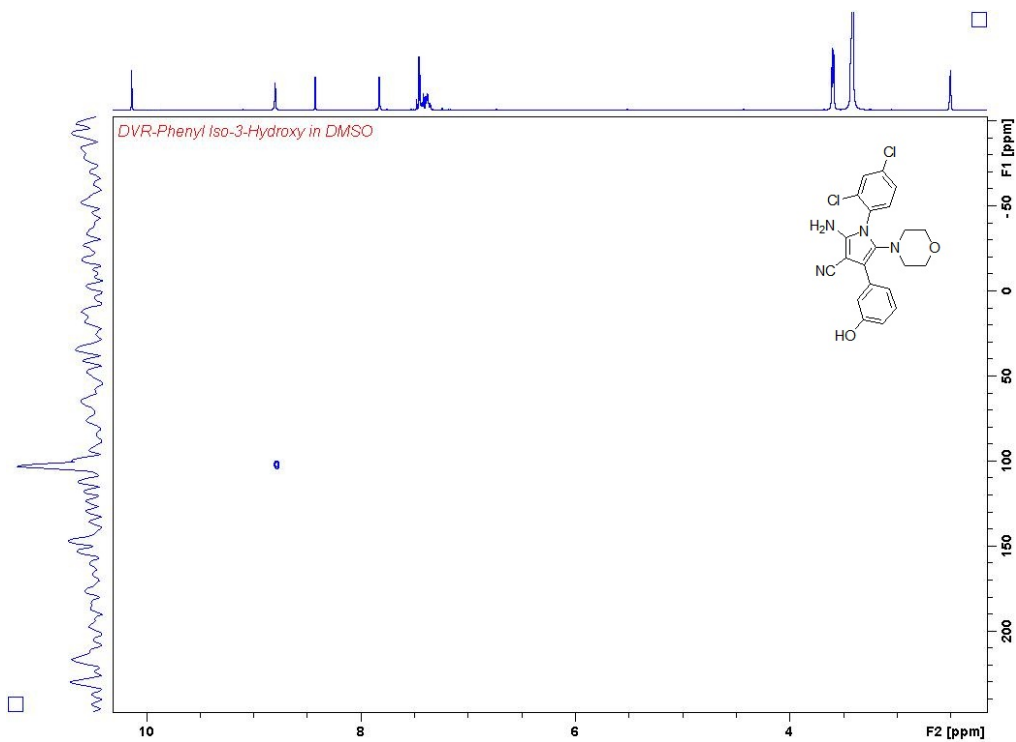

<sup>15</sup>N NMR (ghsqc) spectra of compound 5c

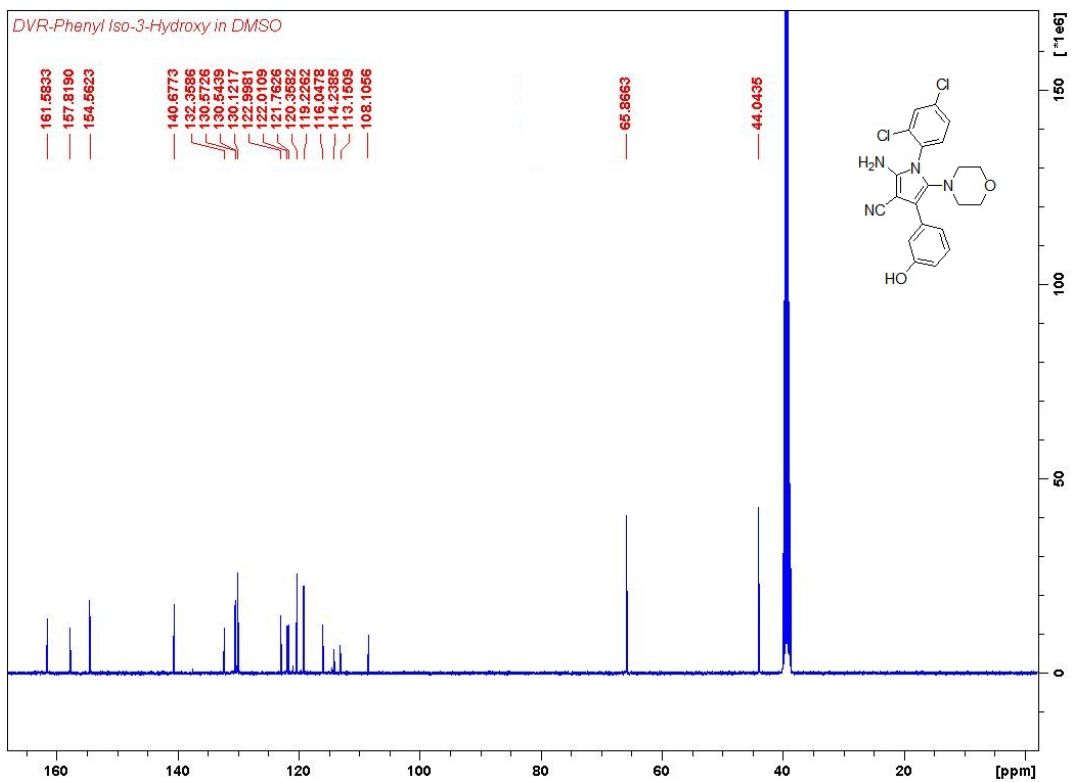

$^{13}\text{C}$  NMR spectra of compound 5c

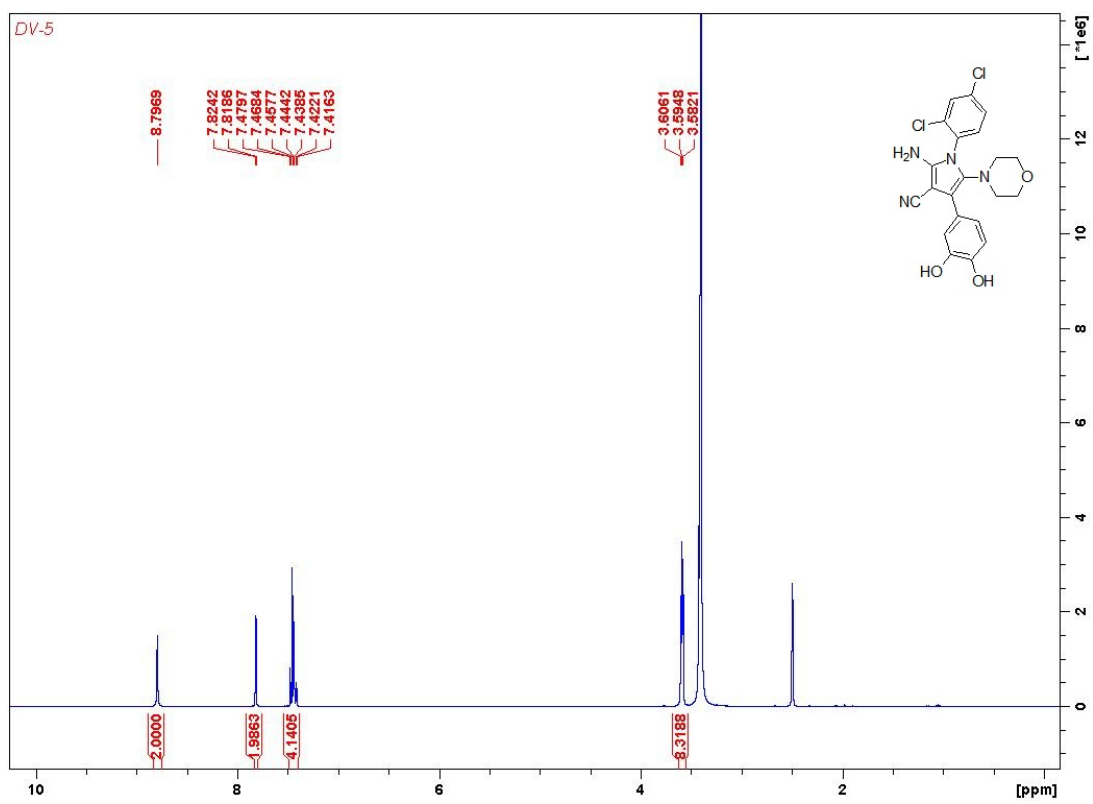

$^1\text{H}$  NMR spectra of compound 5d

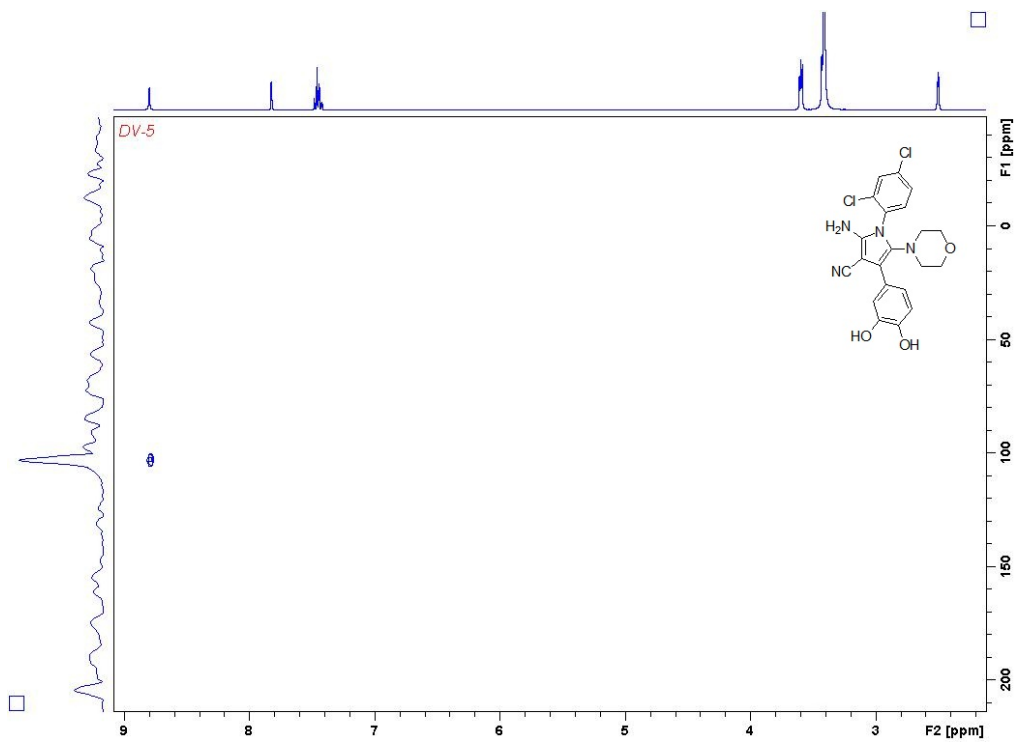

<sup>15</sup>N NMR (ghsqc) spectra of compound **5d**

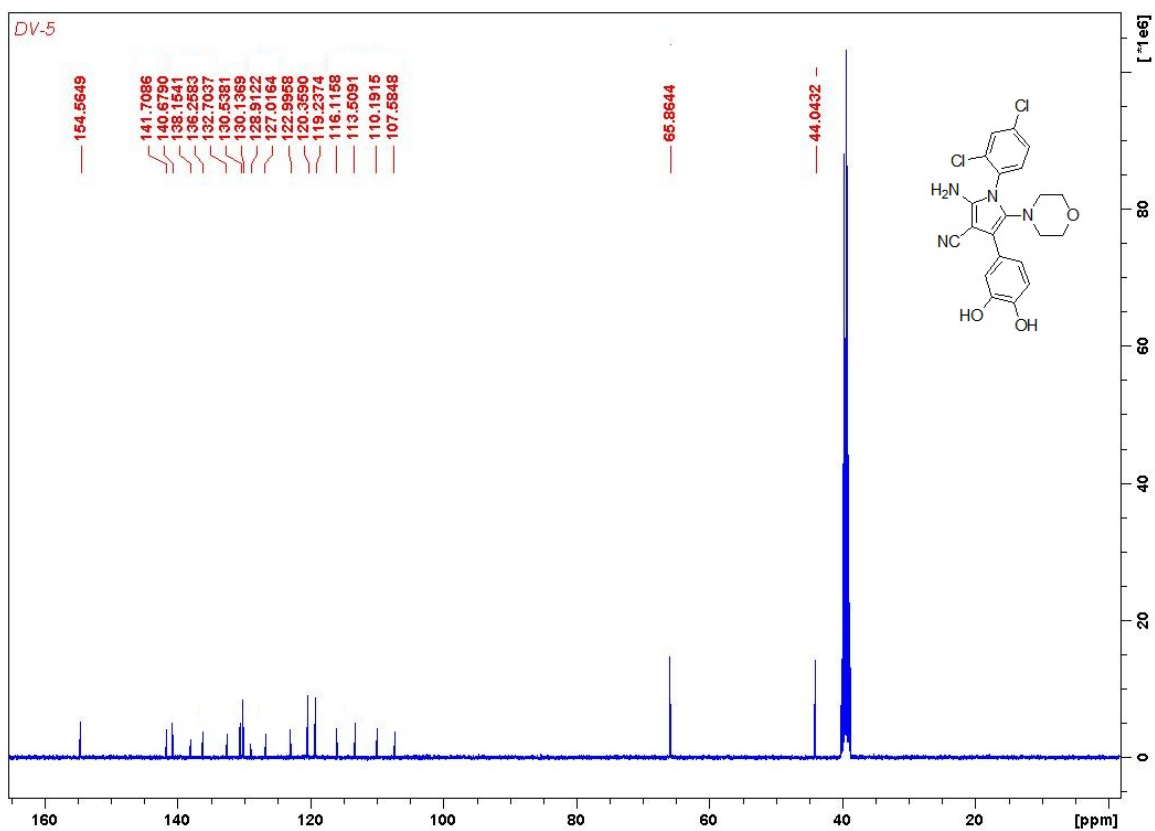

<sup>13</sup>C NMR spectra of compound **5d**

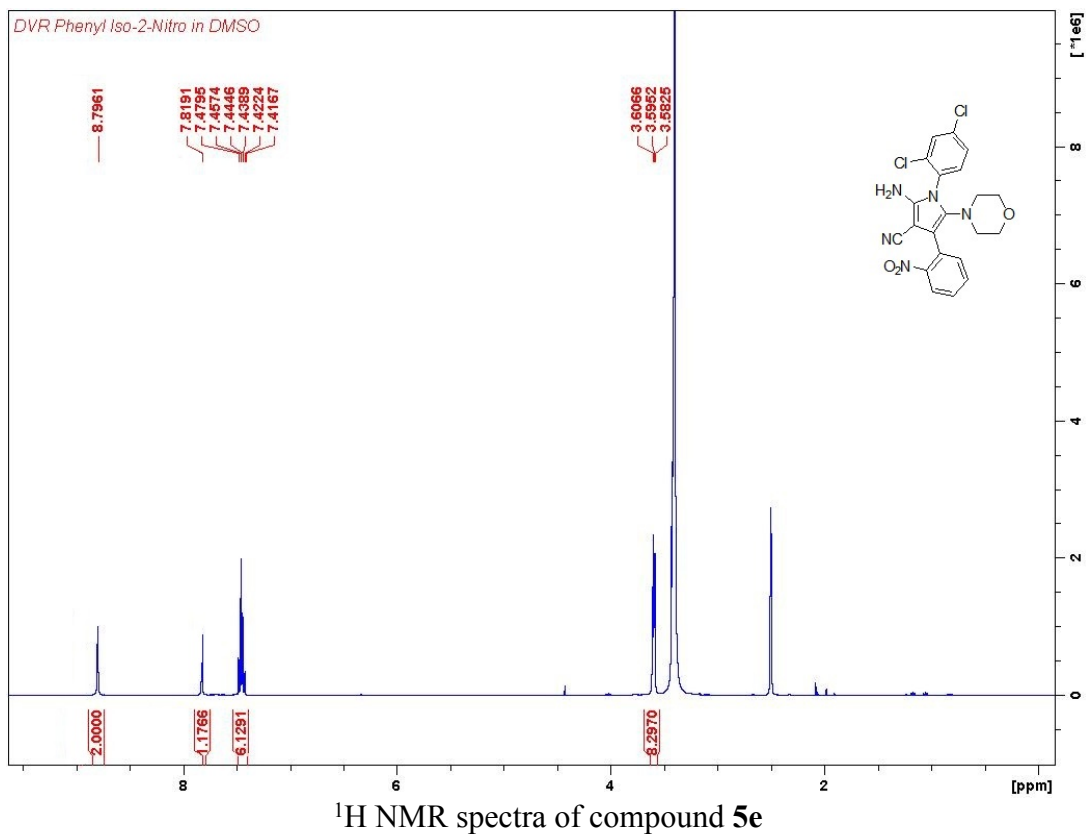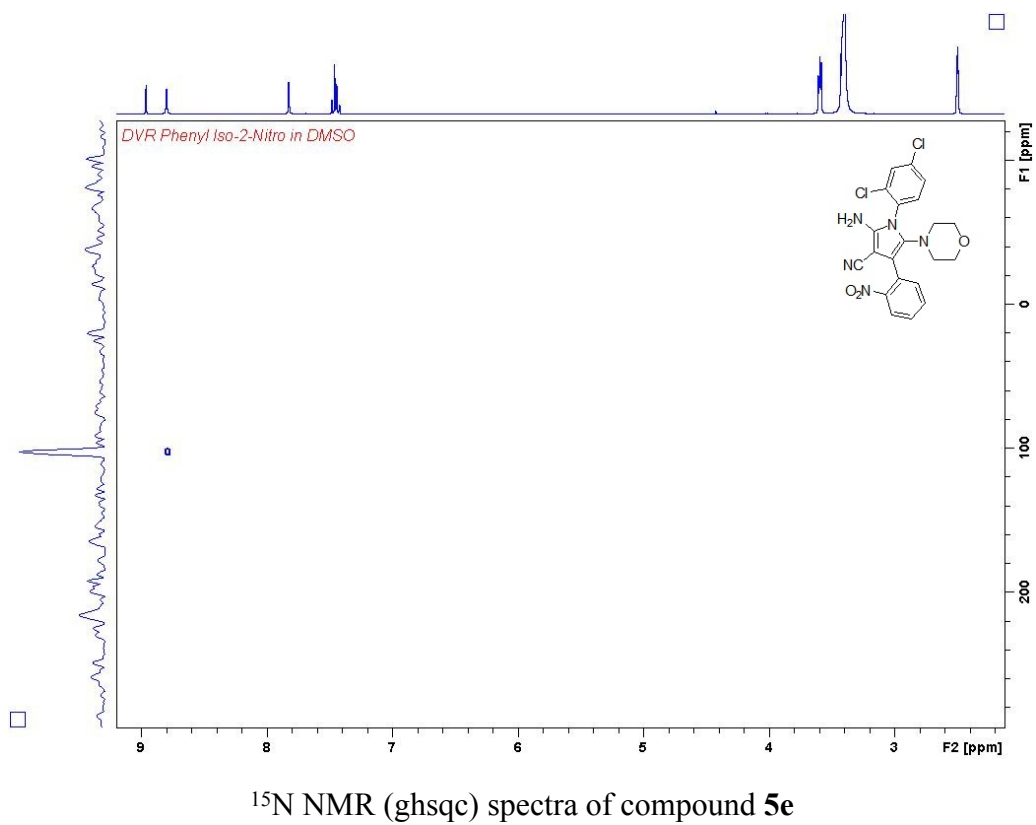



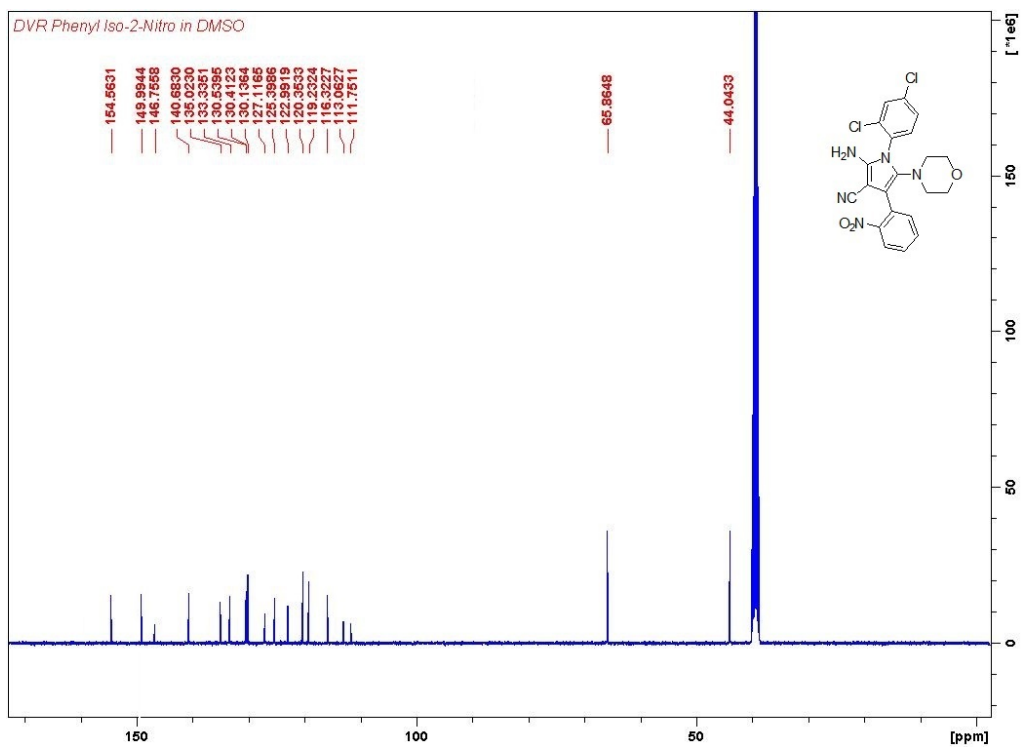

$^{13}\text{C}$  NMR spectra of compound **5e**

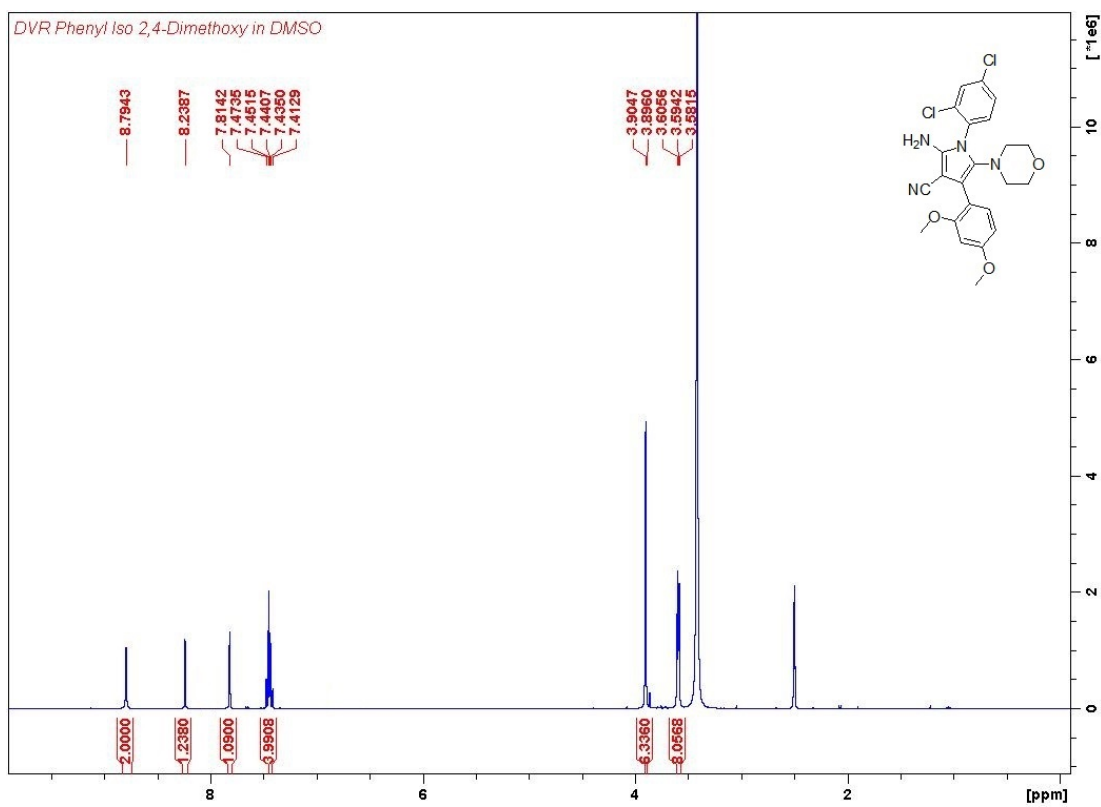

$^1\text{H}$  NMR spectra of compound **5g**

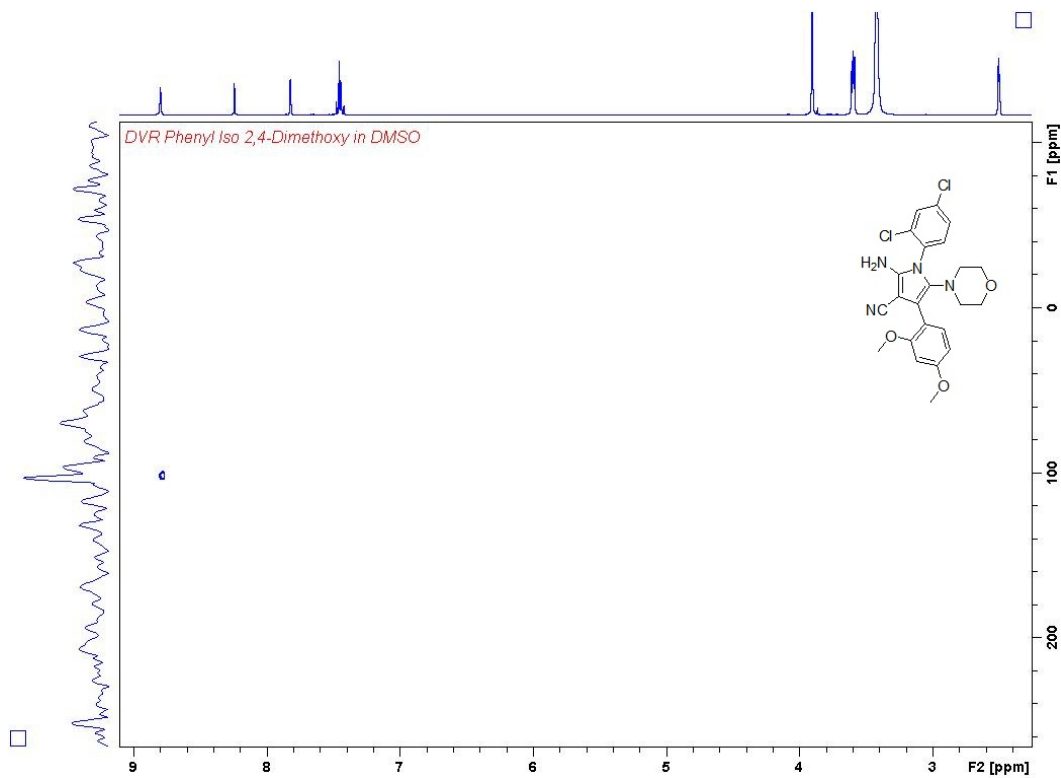

$^{15}\text{N}$  NMR (ghsqc) spectra of compound **5g**

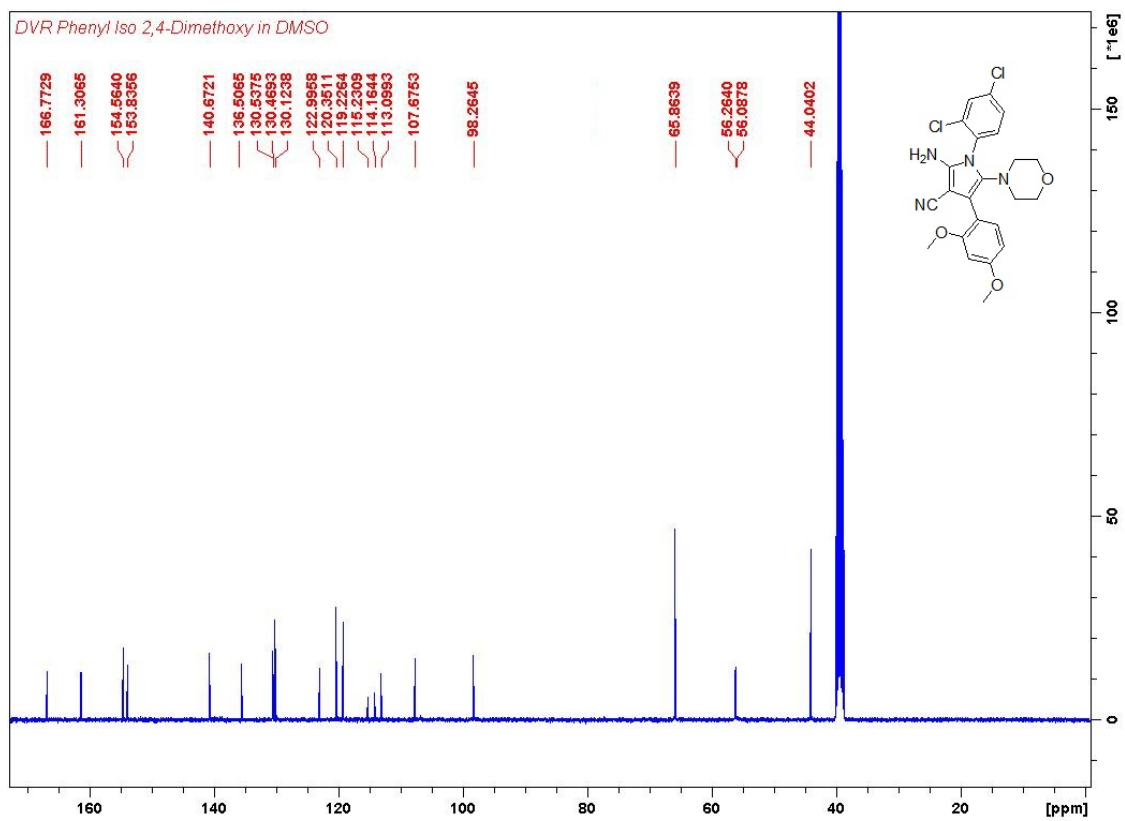

$^{13}\text{C}$  NMR spectra of compound **5g**

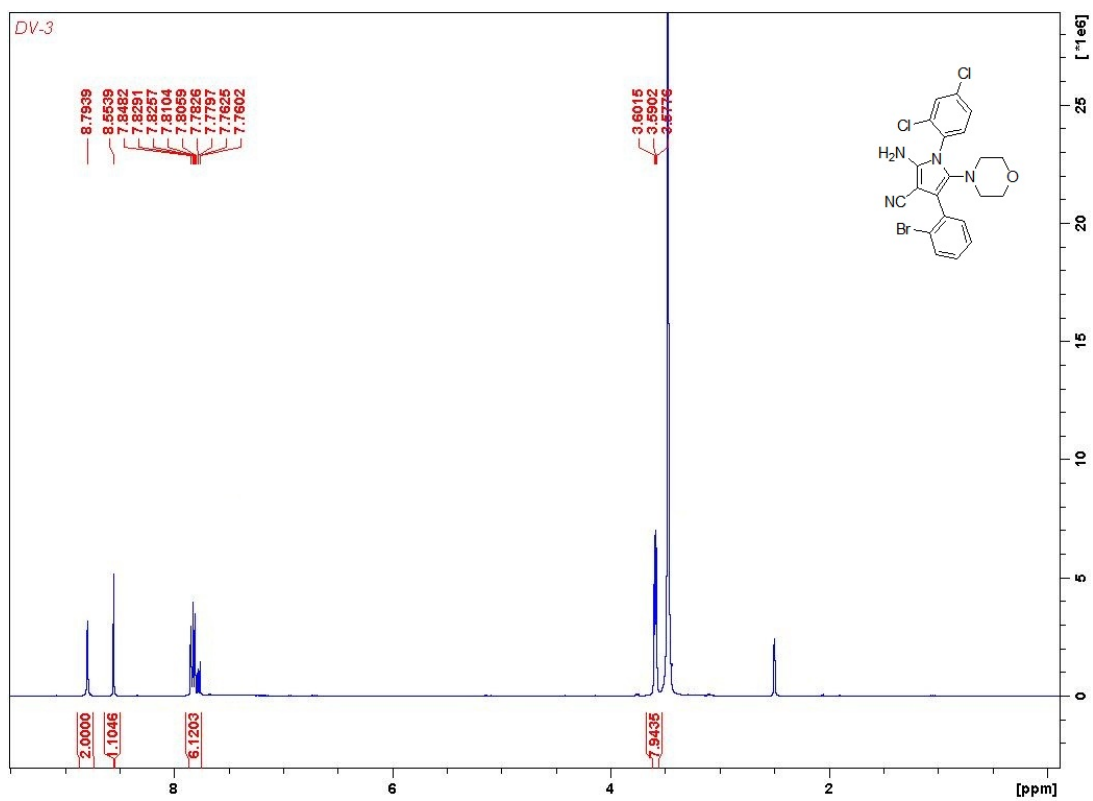

$^1\text{H}$  NMR spectra of compound **5h**

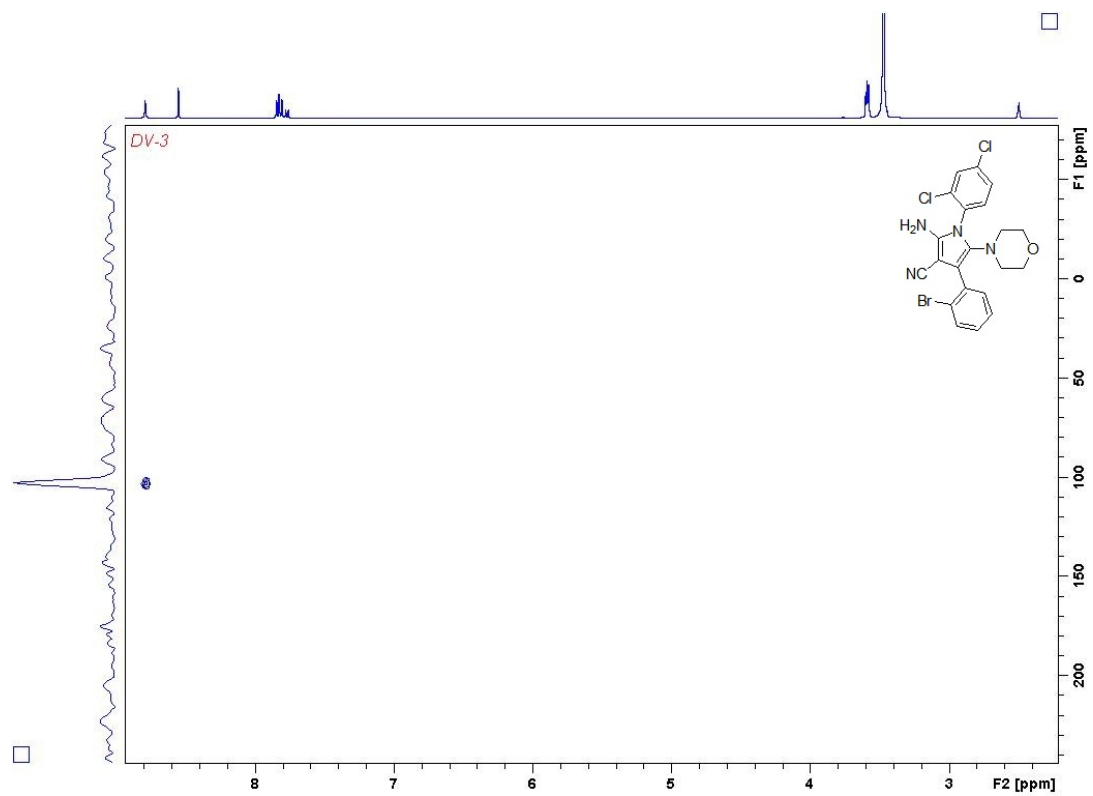

$^{15}\text{N}$  NMR (ghsqc) spectra of compound **5h**

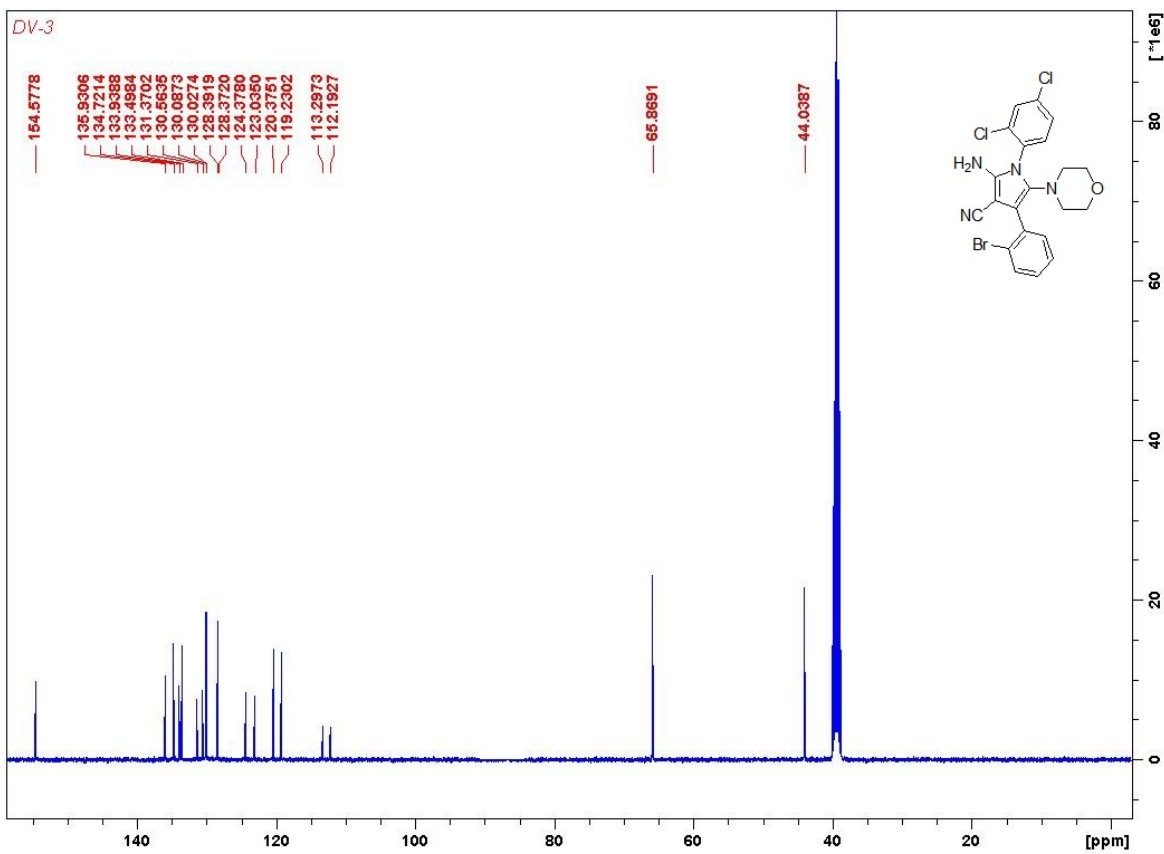

$^{13}\text{C}$  NMR spectra of compound **5h**

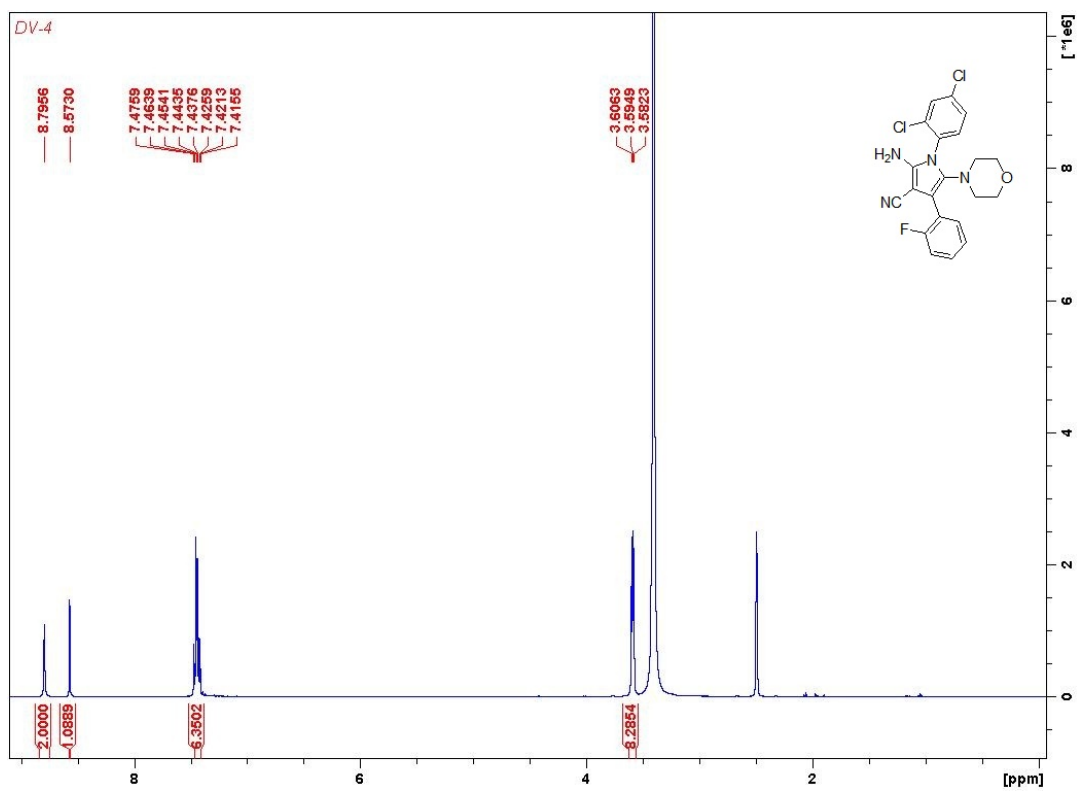

$^1\text{H}$  NMR spectra of compound **5i**

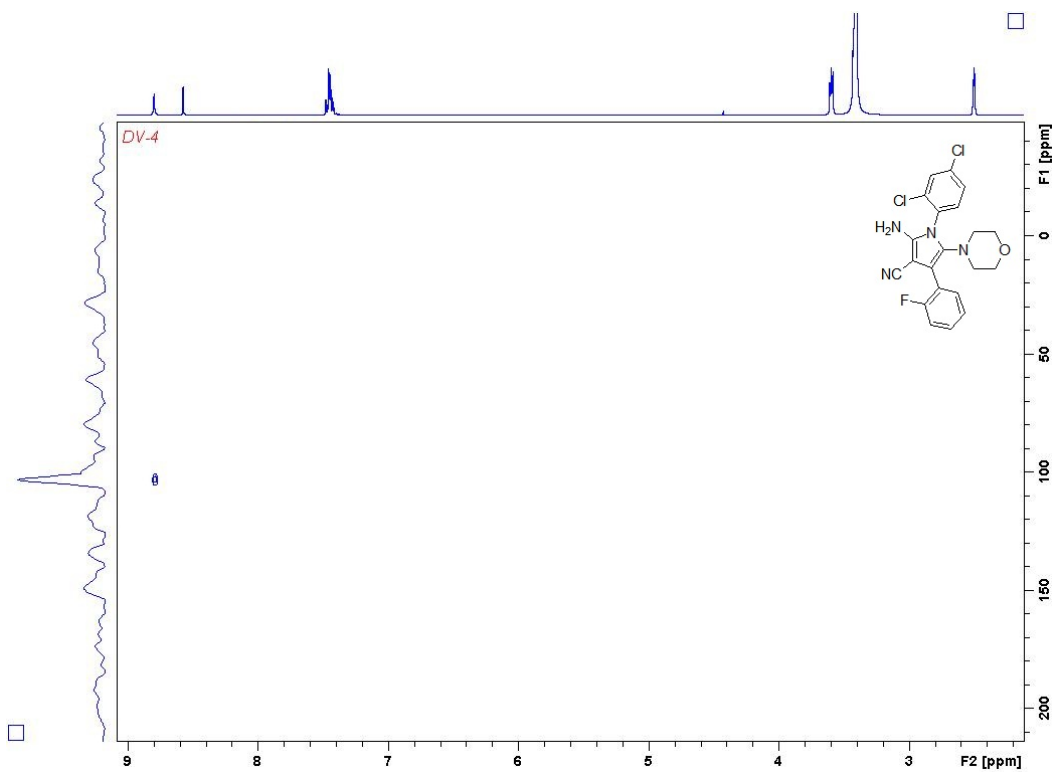

<sup>15</sup>N NMR (ghsqc) spectra of compound **5i**

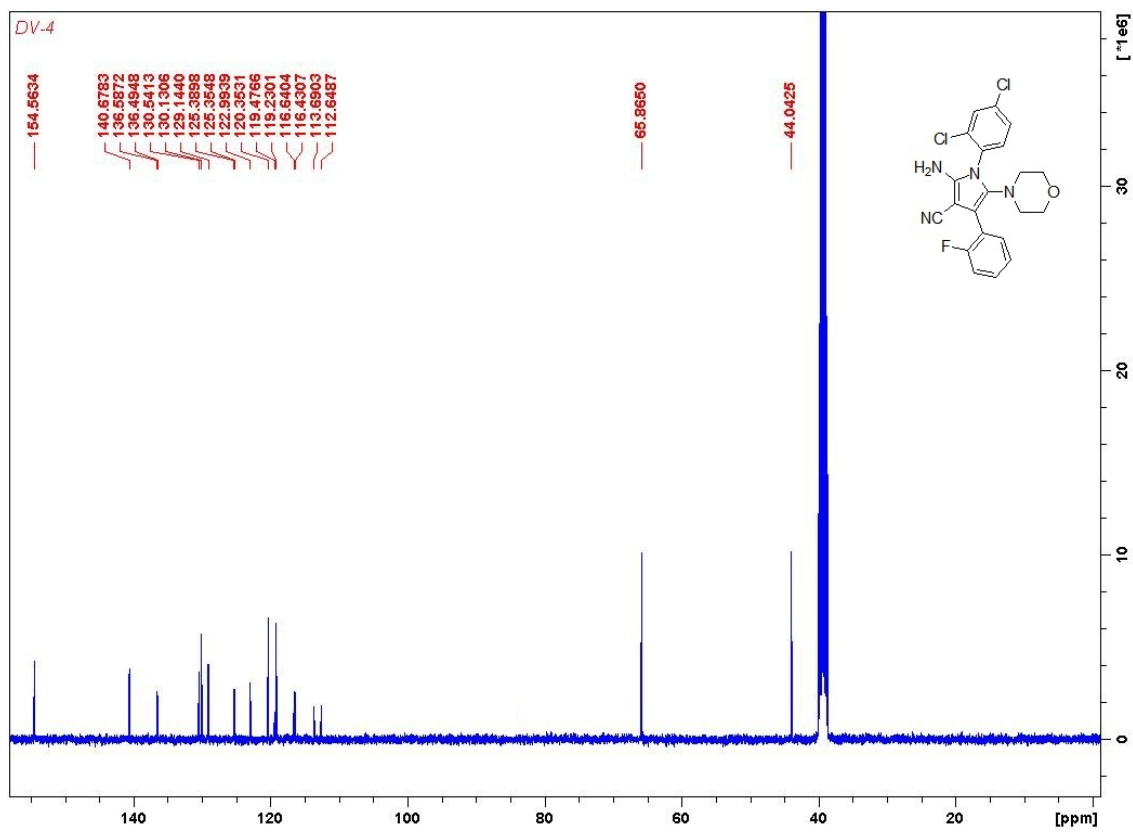

<sup>13</sup>C NMR spectra of compound **5i**

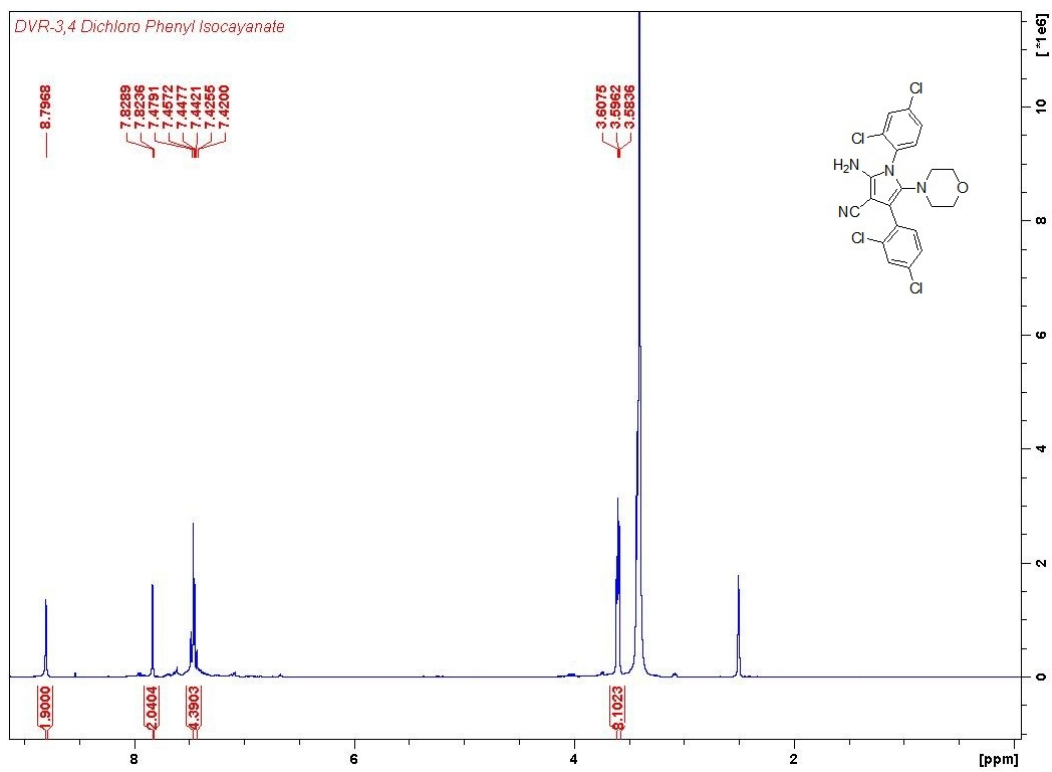

$^1\text{H}$  NMR spectra of compound **5j**

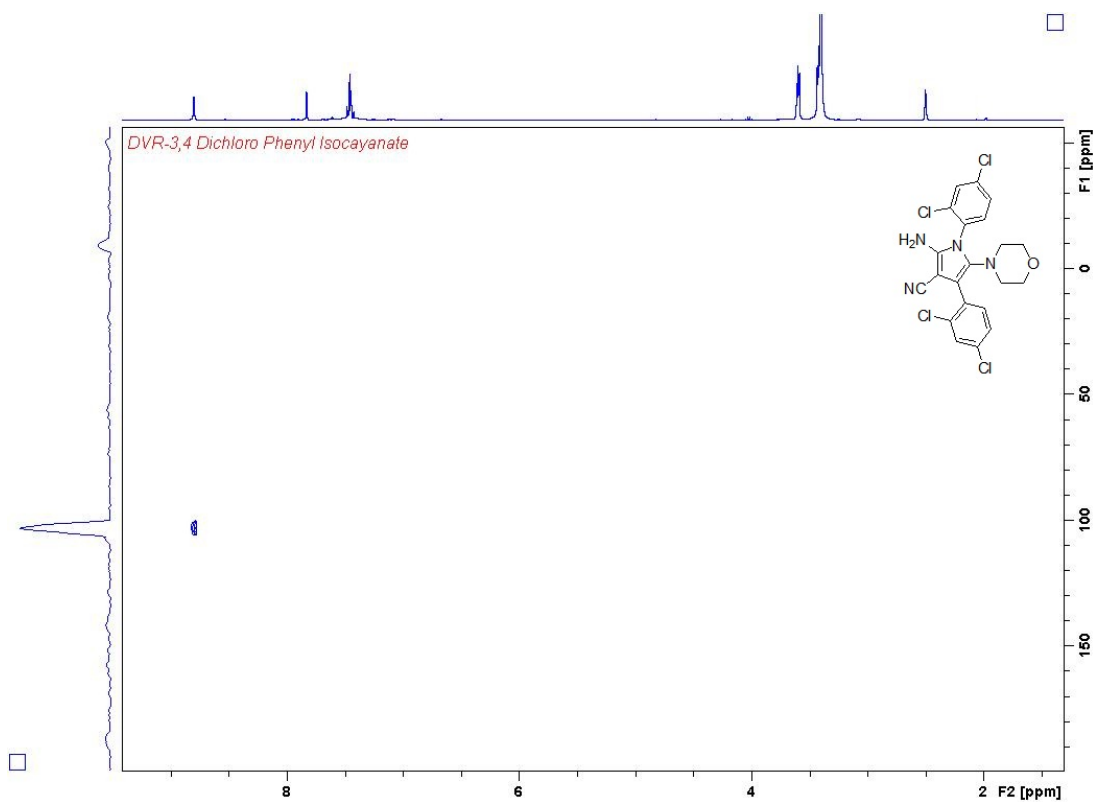

$^{15}\text{N}$  NMR (ghsqc) spectra of compound **5j**

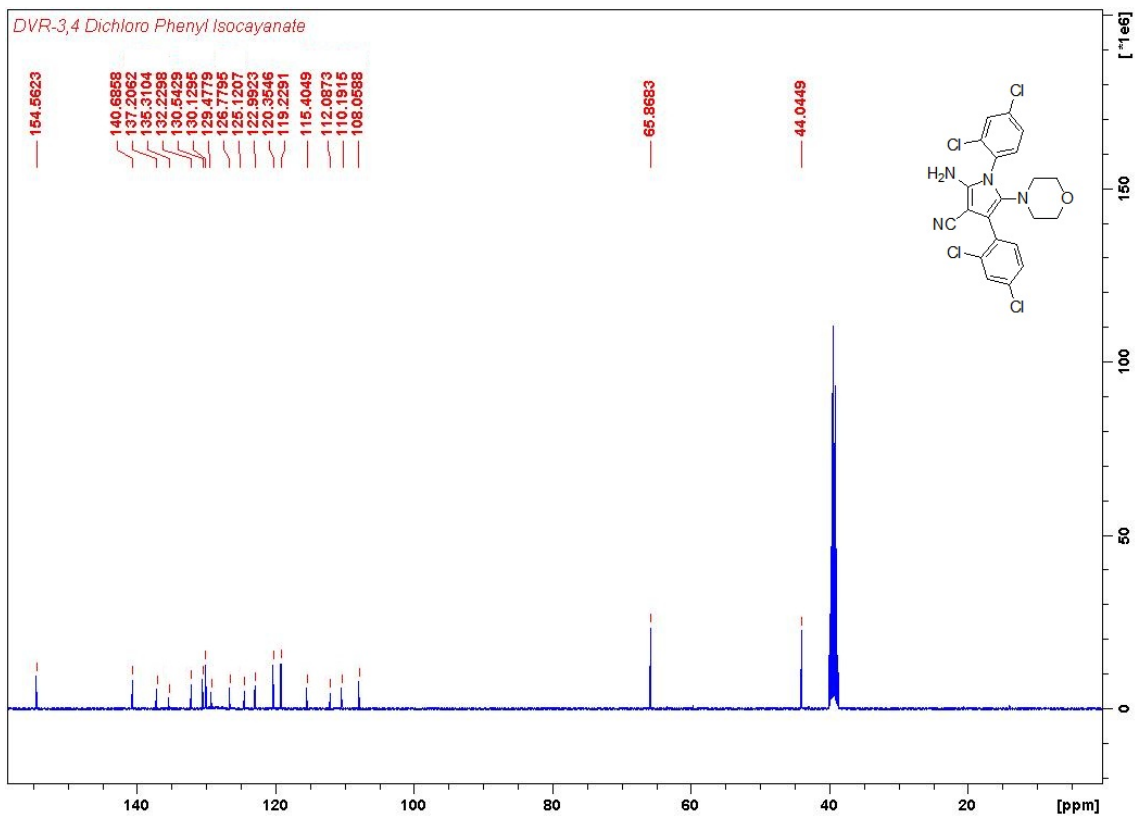

$^{13}\text{C}$  NMR spectra of compound 5j
